# Supplementary material for: Detection of Myositis Autoantibodies by Multi-Analytic Immunoassays in a Large Multicenter Cohort of Patients with Definite Idiopathic Inflammatory Myopathies
Source: MDPI journal article supplement (doi:10.3390/diagnostics13193080), 2023-09-28
Supplement: s1 [file s1]

**Supplementary Table S1:** Demographics and clinical features of the control patients (N = 212)

| <b>Features</b>                         | <b>SLE<br/>N = 90</b> | <b>UCTD<br/>N = 9</b> | <b>SSc<br/>N = 40</b> | <b>SS<br/>N = 24</b> | <b>Myopathy/<br/>Arthropathy<br/>N = 49</b> |
|-----------------------------------------|-----------------------|-----------------------|-----------------------|----------------------|---------------------------------------------|
| Sex Ratio (F/M)                         | 5.9 (77/13)           | 8 (8/1)               | 12.3 (37/3)           | 2.4 (17/7)           | 0.7 (20/29)                                 |
| Age at diagnosis, years (mean $\pm$ SD) | 35 $\pm$ 10           | 34 $\pm$ 7            | 49 $\pm$ 5            | 53 $\pm$ 13          | 47 $\pm$ 10                                 |
| Arthritis                               | 17 (19%)              | 1 (10%)               | 10 (25%)              | 12 (50%)             | 12 (24.5%)                                  |
| Skin disease                            | 19 (21%)              | 1 (11%)               | 38 (95%)              | 8 (33%)              | NA*                                         |
| Raynaud's phenomenon                    | 44 (49%)              | 6 (67%)               | 36 (90%)              | 4 (16.6%)            | 1 (2%)                                      |
| Interstitial lung disease               | 4 (4.4%)              | 0 (0%)                | 17 (42.5%)            | 3 (12.5%)            | 0 (0%)                                      |
| Muscle weakness                         | 18 (20%)              | 2 (22%)               | 13 (32.5%)            | 7 (29%)              | 34 (69%)                                    |
| Serositis                               | 37 (41%)              | 1 (10%)               | 6 (15%)               | 6 (25%)              | 2 (4%)                                      |
| Cytopenia                               | 47 (52%)              | 1 (10%)               | 4 (10%)               | 7 (29%)              | 3 (6%)                                      |
| GNF                                     | 43 (48%)              | 0 (0%)                | 1 (2.5%)              | 5 (21%)              | 0 (0%)                                      |
| CNS involv.                             | 7 (7.8%)              | 0 (0%)                | 0 (0%)                | 0 (0%)               | 0 (0%)                                      |
| Thrombosis                              | 18 (20%)              | 1 (10%)               | 1 (2.5%)              | 1 (4%)               | 1 (2%)                                      |
| PNS involv.                             | 7 (7.8%)              | 0 (0%)                | 2 (5%)                | 3 (12.5%)            | 0 (0%)                                      |

**Footnotes:** SLE: systemic lupus erythematosus; UCTD: undifferentiated connective tissue disease; SSc: systemic sclerosis; SS: Sjögren's syndrome; SD: standard deviation; NA: not applicable; \* only psoriasis has been observed; GNF: glomerulonephritis; CNS: central nervous system; PNS: peripheral nervous system.
