# Supplementary figures and images for: Detection of Myositis Autoantibodies by Multi-Analytic Immunoassays in a Large Multicenter Cohort of Patients with Definite Idiopathic Inflammatory Myopathies
Source: MDPI journal article supplement (doi:10.3390/diagnostics13193080), 2023-09-28

Supplementary Figure S1

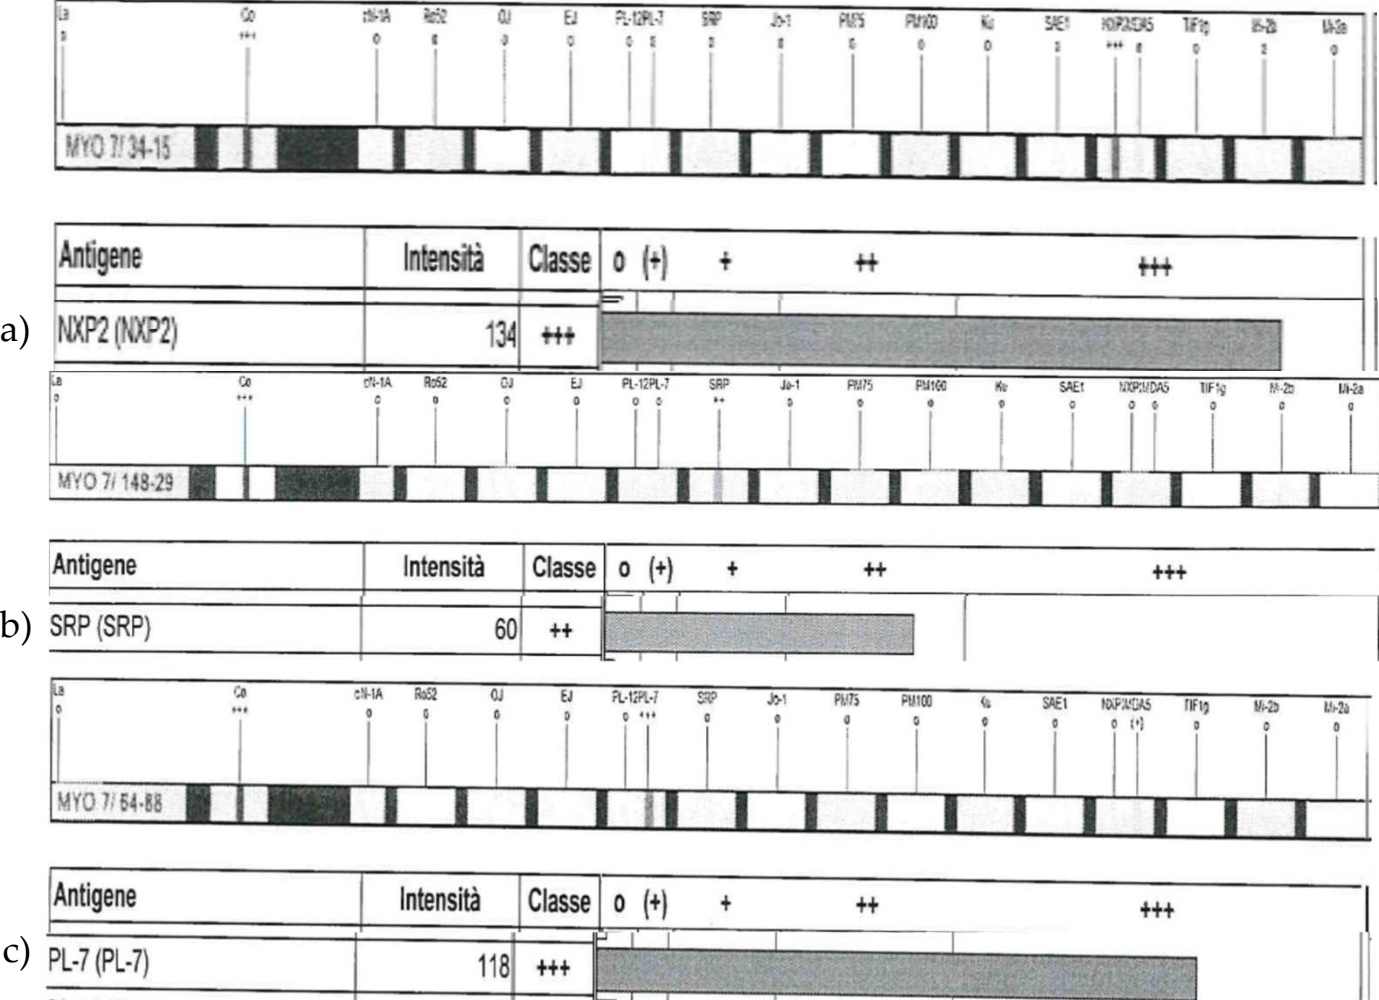

Supplement: s1 [file s1]

Supplementary Figure S2

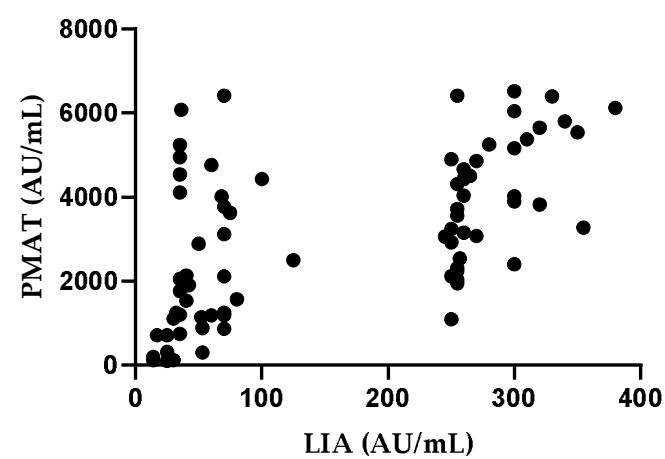

Supplement: s1 [file s1]
